# Supplementary material for: Construction and validation of a hypoxia-related risk signature identified EXO1 as a prognostic biomarker based on 12 genes in lung adenocarcinoma
Source: publisher site journal article supplement (doi:10.18632/aging.204613), 2023-03-25
Supplement: Supplementary file [file aging-v15i6-204613-supplementary-material-SD1.pdf]

## SUPPLEMENTARY TABLE

**Supplementary Table 1. Characteristics of patients in TCGA LUAD dataset.**

| <b>Variables</b> | <b>Whole cohort</b> |
|------------------|---------------------|
| Total number     | 504                 |
| Age (year)       | 65.80 ± 13.5        |
| OS (day)         | 913.6 ± 729.3       |
| Living status    |                     |
| Alive            | 322 (63.89%)        |
| Death            | 182 (36.11%)        |
| Gender           |                     |
| Male             | 233 (46.23%)        |
| Female           | 271 (53.77%)        |
| Stage_T          |                     |
| T1               | 327 (64.88%)        |
| T2               | 96 (19.05%)         |
| T3               | 69(13.69%)          |
| TX               | 12 (2.38%)          |
| Stage_M          |                     |
| M0               | 338 (67.06%)        |
| M1               | 25 (4.96%)          |
| MX               | 141 (27.98%)        |
| Stage_N          |                     |
| N0               | 327 (64.88%)        |
| N1               | 96 (19.05%)         |
| N2               | 71 (14.09%)         |
| NX               | 10 (1.98%)          |
| Stage            |                     |
| Stage I          | 274 (54.36%)        |
| Stage II         | 122 (24.20%)        |
| Stage III        | 83 (16.47%)         |
| Stage IV         | 25 (4.97%)          |
| Recurrence       |                     |
| No               | 320 (63.49%)        |
| Yes              | 184 (36.51%)        |
| Tumor status     |                     |
| Tumor free       | 392 (77.78%)        |
| With tumor       | 112 (22.22%)        |

Abbreviations: TCGA: The Cancer Genome Atlas; LUAD: Lung adenocarcinoma.
